# Supplementary material for: Status of the Multidrug Resistance-1 Gene of Plasmodium falciparum in Four Malaria Epidemiological Strata, Two Decades after the Abolition of Chloroquine as First-Line Treatment for Uncomplicated Malaria in Cameroon
Source: Hindawi journal article supplement (doi:10.1155/2023/6688380), 2023-07-01

FACULTY OF HEALTH SCIENCES- INSTITUTIONAL REVIEW BOARD

IRB00008917-US Office for Human Research Protection (OHRP)IORG007426

Chair : Professor Choukem Simeon Pierre  
Secretary : Associate Professor. Halle-Ekane Edie Gregory

Your Ref \_\_\_\_\_

Our Ref: 2019/ 1018-08 /UB/SG/IRB/FHS

Date: 6<sup>th</sup> November 2019

**Notice of Ethical Approval**

Application number: 1018-08

Principal Investigator: AJONGLEFAC NKENGEH FABRICE

Study Title: Assessing the prevalence of *pfmdr1* Y86, F184 and Y1246 molecular markers of Chloroquine resistance in Douala and Bafoussam 18 Years after the withdrawal of Chloroquine as first line treatment for malaria in Cameroon.

Application Type: Initial  
Sponsor: Student  
Review Type: Normal  
Date of Approval: 6<sup>th</sup> November 2019  
Expiration Date: One year

**Principal Investigator's responsibilities:**

1. The study must be conducted in strict accordance with the protocol approved by the Board
2. Changes to the protocol or its related consent documents must be approved by the Board before implementation
3. Adverse events or unanticipated problems must be reported promptly to the Board
4. Participants must receive a copy of the consent document, if appropriate
5. The Principal Investigator is responsible for the on-going conduct of the study. The study must be implemented according to national and international guidelines for the ethical conduct of research on humans. He must collaborate with the IRB's monitoring of the study's implementation.
6. Any future correspondence must include the application number, and the PI's name in the subject line.
7. A renewal application or project closure report must be submitted at least one month prior to the expiration date indicated above. These must be done using the FHSIRB's secretariat AND an electronic copy sent to: [irbfhs@gmail.com](mailto:irbfhs@gmail.com), making sure to reference the application number indicated above. This form is available at <http://www.healthresearchweb.rg/en/cameroon/institution2130>

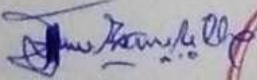  
Assoc. Prof. Halle Ekane Edie Gregory  
Secretary; Institutional Review Board  
Faculty of Health Sciences University of Buea

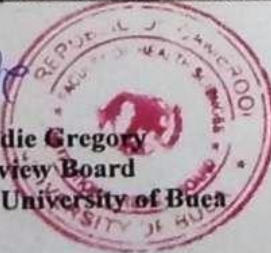

Supplement: f1 [file 6688380.f1.pdf]
